# Supplementary material
Source: HighWire-hosted journal article supplement (https://bmjopen.bmj.com/content/12/4/e059383)
Supplement: inline-supplementary-material-1 [file inline-supplementary-material-1.pdf]

## APPENDICE A: list of study sites

Service de Médecine Intensive Réanimation, Hôpital Tenon, Paris, France

Service de Maladies Infectieuses et Tropicales, Hôpital Tenon, Paris, France

Service de Réanimation Polyvalente, Centre Hospitalier Victor Dupouy, Argenteuil, France.

Service de Médecine Intensive Réanimation, Hôpital Raymond Poincaré, Garches, France.

Service de Maladies Infectieuses et Tropicales, Hôpital Raymond Poincaré, Garches, France.

Service de Réanimation Médicale et Toxicologique, Hôpital Lariboisière, Paris, France

Service de Médecine Intensive Réanimation, Hôpital Saint Antoine, Paris, France

Service de Maladies Infectieuses et Tropicales, Hôpital Saint Antoine, Paris, France.

Service de Médecine Intensive Réanimation, Centre Hospitalo-Universitaire de Poitiers, Poitiers, France.

Service d'Anesthésie-Réanimation polyvalente, Hôpital Saint Camille, Bry-sur-Marne, France

Service de Maladies Infectieuses et Tropicales, Hôpital Saint Camille, Bry-sur-Marne, France

Service de Médecine Intensive Réanimation, Hôpital Simone Veil, Centre Hospitalier de Cannes, Cannes, France

Service de Réanimation Polyvalente, Centre Hospitalier Saint Joseph-Saint Luc, Lyon, France.

Service de Médecine Intensive Réanimation, Centre Hospitalier Léon Binet, Provins, France

Service de Médecine Intensive Réanimation, Hôpital l'Archet 1, Centre Hospitalier Universitaire de Nice, Nice, France.

Service de Maladies Infectieuses et Tropicales. Hôpital l'Archet 1, Centre Hospitalier Universitaire de Nice, Nice, France.

Département de Médecine intensive, Groupe Hospitalier Sud Ile de France, Melun, France.

Service de Réanimation, Centre Hospitalo-Universitaire Lille, Lille, France

Service de pneumologie et de soins intensifs respiratoires, Hôpital Larrey, Toulouse, France

Service de Médecine Intensive Réanimation, Centre Hospitalo-Universitaire Gabriel-Montpied, Clermont-Ferrand, France.

Service de Médecine Intensive Réanimation, Hôpital Louis Mourier, Colombes, France.

Service de Médecine Intensive Réanimation, Centre Hospitalier La Dracenie De Draguignan, Draguignan, France

Service de Médecine intensive Réanimation, Hôpital Pitie Salpêtrière, Paris, France

Service de Réanimation Médico-Chirurgicale, Hôpital Avicenne, Bobigny, France

Service de Maladies Infectieuses et Tropicales, Hôpital Avicenne, Bobigny, France

Service de Médecine Intensive-Réanimation, Hôpital Saint-Louis, Paris, France

Service de Médecine Intensive et Réanimation Infectieuse, Hôpital Bichat, Paris, France

Service de Médecine Intensive-Réanimation, Centre Hospitalier Sud Francilien, Corbeil-Essonnes, France

Service de Médecine Intensive Réanimation, Hôpitaux Universitaires Henri Mondor-Albert Chenevier, Créteil, France

Service du Département d'Aval des Urgences, Hôpitaux Universitaires Henri Mondor-Albert Chenevier, Créteil, France

Service de Maladies Infectieuses et Tropicales, Hôpitaux Universitaires Henri Mondor-Albert Chenevier, Créteil, France
